# Supplementary material for: A Pleiotropic Role of Long Non-Coding RNAs in the Modulation of Wnt/β-Catenin and PI3K/Akt/mTOR Signaling Pathways in Esophageal Squamous Cell Carcinoma: Implication in Chemotherapeutic Drug Response
Source: MDPI journal article supplement (doi:10.3390/curroncol29040189), 2022-03-26
Supplement: s1 [file s1]

*Supplementary Material*

# **A Pleiotropic Role of Long Non-Coding RNAs in the Modulation of Wnt/ $\beta$ -Catenin and PI3K/Akt/mTOR Signaling Pathways in Esophageal Squamous Cell Carcinoma: Implication in Chemotherapeutic Drug Response**

**Uttam Sharma <sup>1</sup>, Masang Murmu <sup>1</sup>, Tushar Singh Barwal <sup>1</sup>, Hardeep Singh Tuli <sup>2</sup>, Manju Jain <sup>3</sup>, Hridayesh Prakash <sup>4</sup>, Tea Kaceli <sup>5</sup>, Aklank Jain <sup>1,\*</sup> and Anupam Bishayee <sup>5,\*</sup>**

<sup>1</sup> Department of Zoology, Central University of Punjab, Ghudda 151 401, Punjab, India

<sup>2</sup> Department of Biotechnology, Maharishi Markandeshwar (Deemed to be University), Mullana-Ambala 133 207, Haryana, India

<sup>3</sup> Department of Biochemistry, Central University of Punjab, Ghudda 151 401, Punjab, India;

<sup>4</sup> Amity Institute of Virology and Immunology, Amity University, Noida 201 301, Uttar Pradesh, India;

<sup>5</sup> College of Osteopathic Medicine, Lake Erie College of Osteopathic Medicine, Bradenton, FL 34211, USA

\* Correspondence: aklankjain@gmail.com (A.J.); abishayee@lecom.edu, abishayee@gmail.com (A.B)

**Table S1.** Association of ESCC related lncRNAs in various signalling pathways.

| S No. | LncRNA                                    | Full Form                                                          | Signalling pathways                    | References |
|-------|-------------------------------------------|--------------------------------------------------------------------|----------------------------------------|------------|
| 1     | <i>HOTAIR</i>                             | HOX Transcript Antisense RNA                                       | Wnt signaling pathway                  | [67]       |
| 2     | <i>LINC RNA-uc003opf.1 or (LINC00951)</i> | Long Intergenic Non-Protein Coding RNA 951                         | NA                                     | [68]       |
| 3     | <i>ANRIL or CDKN2B-AS1</i>                | Cyclin Dependent Kinase Inhibitor 2B Antisense RNA 1               | TGFβ1 signaling pathway                | [34]       |
| 4     | <i>FOXCUT</i>                             | Forkhead Box C1 Upstream Transcript                                | NA                                     | [69]       |
| 5     | <i>H19</i>                                | H19 Imprinted Maternally Expressed Transcript                      | IGF2 imprinting pathway                | [70]       |
| 6     | <i>LINC-POU3F3</i>                        | POU Class 3 Homeobox 3                                             | NA                                     | [71]       |
| 7     | <i>LOC285194</i>                          | Also known as Tumor Suppressor Candidate 7 ( <i>TUSC7</i> )        | NA                                     | [54]       |
| 8     | <i>PLncRNA-1 or CBR3-AS1</i>              | CBR3 Antisense RNA 1                                               | NA                                     | [72]       |
| 9     | <i>SOX2OT</i>                             | SRY-Box Transcription Factor 2 Overlapping Transcript              | NA                                     | [73]       |
| 10    | <i>SPRY4-IT1</i>                          | Sprouty RTK Signaling Antagonist 4 Intronic Transcript 1           | NA                                     | [74]       |
| 11    | <i>UCA1</i>                               | Urothelial Cancer Associated 1                                     | Wnt signaling pathway                  | [75]       |
| 12    | <i>91H</i>                                | Long noncoding RNA 91H                                             | NA                                     | [76]       |
| 13    | <i>BOKAS or BOK-AS1</i>                   | BOK antisense RNA 1                                                | Wnt/β-catenin signaling pathway        | [77]       |
| 14    | <i>CCAT2</i>                              | Colon Cancer Associated Transcript 2                               | β-catenin/WISP1 signaling pathway      | [78]       |
| 15    | <i>LINC RNA-uc002yug.2 or LINC01426</i>   | Long Intergenic Non-Protein Coding RNA 1426                        | NA                                     | [79]       |
| 16    | <i>Long noncoding RNA POLR2E</i>          | RNA Polymerase II, I And III Subunit E                             | NA                                     | [80]       |
| 17    | <i>MALAT1</i>                             | Metastasis Associated Lung Adenocarcinoma Transcript 1             | β-catenin, ATM-CHEK2 signaling pathway | [81]       |
| 18    | <i>NEAT1</i>                              | Nuclear Paraspeckle Assembly Transcript 1                          | NA                                     | [82]       |
| 19    | <i>PCAT-1</i>                             | Prostate Cancer Associated Transcript 1                            | NA                                     | [83]       |
| 20    | <i>POU3F3</i>                             | POU Class 3 Homeobox 3                                             | NA                                     | [84]       |
| 21    | <i>SOX2OT</i>                             | SRY-Box Transcription Factor 2 Overlapping Transcript              | NA                                     | [85]       |
| 22    | <i>TUG1</i>                               | Taurine Up-Regulated 1                                             | Wnt/β-catenin, Nrf2 signaling pathways | [86]       |
| 23    | <i>ZEB1-AS1</i>                           | Zinc Finger E-Box Binding Homeobox 1 Antisense RNA 1               | NA                                     | [87]       |
| 24    | <i>AFAP1-AS1</i>                          | Actin Filament Associated Protein 1 Antisense RNA 1                | NA                                     | [88]       |
| 25    | <i>BANCR</i>                              | BRAF-Activated Non-Protein Coding RNA                              | IGF1R/Raf/MEK/ERK signaling pathway    | [89]       |
| 26    | <i>BC032469</i>                           |                                                                    | NA                                     | [90]       |
| 27    | <i>BC200 or BCYRN1</i>                    | Also known as Brain Cytoplasmic RNA 1                              | NA                                     | [91]       |
| 28    | <i>CASC9</i>                              | Cancer Susceptibility 9                                            | NA                                     | [92]       |
| 29    | <i>HOTTIP</i>                             | HOXA Distal Transcript Antisense RNA                               | NA                                     | [93]       |
| 30    | <i>LINC-ROR</i>                           | Long Intergenic Non-Protein Coding RNA, Regulator Of Reprogramming | p53 signaling pathway                  | [94]       |
| 31    | <i>LOC100130476 or WAKMAR2</i>            | Wound and Keratinocyte Migration Associated LncRNA 2               | NA                                     | [95]       |

|    |                                    |                                                                |                                                               |       |
|----|------------------------------------|----------------------------------------------------------------|---------------------------------------------------------------|-------|
| 32 | <i>MEG3</i>                        | Maternally expressed gene 3                                    | p53 signaling pathway                                         | [96]  |
| 33 | <i>SOX2OT and SOX2</i>             | SOX2 Overlapping Transcript and SRY-Box Transcription Factor 2 | NA                                                            | [97]  |
| 34 | <i>ATB</i>                         | Long Noncoding RNA Activated By TGF-Beta                       | NA                                                            | [98]  |
| 35 | <i>CCAT1</i>                       | Colon Cancer Associated Transcript 1                           | NA                                                            | [99]  |
| 36 | <i>ESCCAL-1 or CASC9</i>           | Cancer Susceptibility 9                                        | NA                                                            | [100] |
| 37 | <i>GHE1</i>                        | Gastric Carcinoma Proliferation Enhancing Transcript 1         | NA                                                            | [101] |
| 38 | <i>HNF1A-AS1</i>                   | HNF1 Homeobox A Antisense RNA 1                                | NA                                                            | [102] |
| 39 | <i>HOTAIR</i>                      | HOX transcript antisense RNA                                   | NA                                                            | [103] |
| 40 | <i>LINC00460</i>                   | Long Intergenic Non-Protein Coding RNA 460                     | NA                                                            | [104] |
| 41 | <i>LINC RNA-NR_024015 or TDRG1</i> | Also known as Testis Development Related 1                     | NA                                                            | [105] |
| 42 | <i>MEG3</i>                        | Maternally expressed gene 3                                    | GSK-3 $\beta$ /Snail/ Wnt/ $\beta$ -catenin signaling pathway | [106] |
| 43 | <i>MIR31HG</i>                     | MIR31 Host Gene                                                | NA                                                            | [107] |
| 44 | <i>NORAD</i>                       | Non-Coding RNA Activated By DNA Damage                         | NA                                                            | [108] |
| 45 | <i>Pseudogene PHBP1</i>            | Prohibitin Pseudogene 1                                        | NA                                                            | [109] |
| 46 | <i>PVT1</i>                        | Pvt1 Oncogene                                                  | NA                                                            | [110] |
| 47 | <i>RP11-766N7.4 or LINC02231</i>   | Long Intergenic Non-Protein Coding RNA 2231                    | NA                                                            | [111] |
| 48 | <i>SNHG1</i>                       | Small Nucleolar RNA Host Gene 1                                | Notch signaling pathway                                       | [27]  |
| 49 | <i>SNHG16</i>                      | Small Nucleolar RNA Host Gene 16                               | Wnt/ $\beta$ -catenin signaling pathway                       | [112] |
| 50 | <i>XIST</i>                        | X Inactive Specific Transcript                                 | NA                                                            | [113] |
| 51 | <i>ZFAS1</i>                       | ZNF1 Antisense RNA 1                                           | STAT3 signaling pathway                                       | [114] |
| 52 | <i>AK001796 or MIR4435-2HG</i>     | MIR4435-2 Host Gene                                            | MDM2/ p53 signaling pathway                                   | [115] |
| 53 | <i>DANCR</i>                       | Differentiation Antagonizing Non-Protein Coding RNA            | NA                                                            | [116] |
| 54 | <i>DUXAP10</i>                     | Double Homeobox A Pseudogene 10                                | NA                                                            | [117] |
| 55 | <i>DUXAP8</i>                      | Double Homeobox A Pseudogene 8                                 | NA                                                            | [118] |
| 56 | <i>ECM</i>                         | long non-coding RNA-extracellular matrix                       | NA                                                            | [119] |
| 57 | <i>EZR-AS1</i>                     | Ezrin Antisense RNA 1                                          | NA                                                            | [120] |
| 58 | <i>FAM201A</i>                     | Family With Sequence Similarity 201 Member A                   | NA                                                            | [121] |
| 59 | <i>FER1L4</i>                      | Fer-1 Like Family Member 4 (Pseudogene)                        | NA                                                            | [122] |
| 60 | <i>FOX2-AS1</i>                    | Forkhead Box D2 Adjacent Opposite Strand RNA 1                 | Akt signaling pathway                                         | [123] |
| 61 | <i>FTH1P3</i>                      | Ferritin Heavy Chain 1 Pseudogene 3                            | NF-kB signaling pathway                                       | [26]  |
| 62 | <i>GAS5</i>                        | Growth Arrest Specific 5                                       | NA                                                            | [124] |
| 63 | <i>HOXA11-AS</i>                   | Homeobox A11 Antisense RNA                                     | NA                                                            | [125] |
| 64 | <i>LET</i>                         | long noncoding RNA-LET                                         | NA                                                            | [126] |
| 65 | <i>LINC00657 or NORAD</i>          | Also known as Non-Coding RNA Activated By DNA Damage           | NA                                                            | [127] |

|    |                                    |                                                                                              |                                                                       |       |
|----|------------------------------------|----------------------------------------------------------------------------------------------|-----------------------------------------------------------------------|-------|
| 66 | <i>LINC00675 or TMEM238L</i>       | Also known as Transmembrane Protein 238                                                      | Wnt/ $\beta$ -catenin signaling pathway                               | [13]  |
| 67 | <i>LINC01133</i>                   | Long Intergenic Non-Protein Coding RNA 1133                                                  | NA                                                                    | [128] |
| 68 | <i>LINC01296 or DUXAP9</i>         | Double Homeobox A Pseudogene 9                                                               | NA                                                                    | [129] |
| 69 | <i>LINC01503</i>                   | Long Intergenic Non-Protein Coding RNA 1503                                                  | NA                                                                    | [130] |
| 70 | <i>LINC-UBC1 or UBE2K</i>          | Also known as Ubiquitin Conjugating Enzyme E2 K                                              | NA                                                                    | [131] |
| 71 | <i>LncRNA CTC-276P9.1 or EPIST</i> | Esophagus Epithelial Intergenic Associated Transcript                                        | NA                                                                    | [132] |
| 72 | <i>LUCAT1</i>                      | Lung Cancer Associated Transcript 1                                                          | NA                                                                    | [133] |
| 73 | <i>NKILA</i>                       | NF-KappaB Interacting LncRNA                                                                 | NF- $\kappa$ B signaling pathway                                      | [25]  |
| 74 | <i>NMR</i>                         | NSUN2 methylated lncRNA                                                                      | ERK1/2 signaling pathway                                              | [134] |
| 75 | <i>PART1</i>                       | Prostate Androgen-Regulated Transcript 1                                                     | NA                                                                    | [63]  |
| 76 | <i>SBF2-AS1</i>                    | SET Binding Factor 2 Antisense RNA 1                                                         | NA                                                                    | [135] |
| 77 | <i>SNHG6</i>                       | Small nucleolar host gene 6                                                                  | NA                                                                    | [136] |
| 78 | <i>TTN-AS1</i>                     | Titin Antisense RNA 1                                                                        | NA                                                                    | [137] |
| 79 | <i>TUSC7</i>                       | Tumor Suppressor Candidate 7                                                                 | NA                                                                    | [55]  |
| 80 | <i>UCA1 and MALAT1</i>             | Urothelial Cancer Associated 1 and Metastasis Associated Lung Adenocarcinoma Transcript 1    | NA                                                                    | [138] |
| 81 | <i>CASC2</i>                       | Cancer Susceptibility 2                                                                      | Akt signaling pathway                                                 | [139] |
| 82 | <i>DANCR and ZEB1</i>              | Differentiation Antagonizing Non-Protein Coding RNA and Zinc Finger E-Box Binding Homeobox 1 | NA                                                                    | [140] |
| 83 | <i>DLX6-AS1</i>                    | Distal-Less Homeobox 6 Antisense RNA 1                                                       | NA                                                                    | [141] |
| 84 | <i>DNM3OS</i>                      | DNM3 Opposite Strand/Antisense RNA                                                           | NA                                                                    | [142] |
| 85 | <i>ErbB4-IR</i>                    | Erb-B2 Receptor Tyrosine Kinase 4 - IR                                                       | NA                                                                    | [143] |
| 86 | <i>FEZF1-AS1</i>                   | FEZ Family Zinc Finger 1 Antisense RNA 1                                                     | JAK2/STAT3 signaling pathway, Wnt/ $\beta$ -catenin signaling pathway | [38]  |
| 87 | <i>FMR1-AS1</i>                    | FMRP Translational Regulator 1 Antisense RNA 1                                               | NF $\kappa$ B/c-Myc signaling pathway                                 | [144] |
| 88 | <i>HAND2-AS1</i>                   | Heart And Neural Crest Derivatives Expressed 2 Antisense RNA 1                               | NA                                                                    | [145] |
| 89 | <i>HERES</i>                       |                                                                                              | Wnt signaling pathways                                                | [9]   |
| 90 | <i>IRF1-AS</i>                     | Interferon Regulatory Factor 1                                                               | NA                                                                    | [146] |
| 91 | <i>LBX2-AS1</i>                    | Ladybird Homeobox 2 Antisense RNA 1                                                          | NA                                                                    | [147] |
| 92 | <i>LEF1-AS1</i>                    | Lymphoid Enhancer Binding Factor 1 Antisense RNA 1                                           | NA                                                                    | [148] |
| 93 | <i>LINC00152 or CYTOR</i>          | Cytoskeleton Regulator RNA                                                                   | NA                                                                    | [149] |
| 94 | <i>LINC00473</i>                   | Long Intergenic Non-Protein Coding RNA 473                                                   | NA                                                                    | [150] |
| 95 | <i>LINC01419</i>                   | Long Intergenic Non-Protein Coding RNA 1419                                                  | NA                                                                    | [60]  |

|     |                                 |                                                                           |                                 |       |
|-----|---------------------------------|---------------------------------------------------------------------------|---------------------------------|-------|
| 96  | <i>LINC01518</i>                | Long Intergenic Non-Protein Coding RNA 1518                               | PIK3CA/Akt signaling pathway    | [151] |
| 97  | <i>LINC01980</i>                | Long Intergenic Non-Protein Coding RNA 1980                               | MYO5A signaling pathway         | [152] |
| 98  | <i>LINC RNA-p21 or TP53COR1</i> | Also known as Tumor Protein P53 signaling Corepressor 1                   | p53 signaling pathway           | [33]  |
| 99  | <i>Lnc-ATB</i>                  | Long Noncoding RNA Activated By TGF-Beta                                  | NA                              | [153] |
| 100 | <i>LncRNAXLOC_001659</i>        | Long Noncoding RNA XLOC_001659                                            | NA                              | [154] |
| 101 | <i>LSINCT5</i>                  | Long Stress-Induced Non-Coding Transcript 5                               | NA                              | [155] |
| 102 | <i>MNX1-AS1</i>                 | Motor Neuron And Pancreas Homeobox 1 Antisense RNA 1                      | NA                              | [156] |
| 103 | <i>NR2F1-AS1</i>                | Nuclear Receptor Subfamily 2 Group F Member 1 Antisense RNA 1             | Hedgehog signaling pathway      | [32]  |
| 104 | <i>PANDA or PANDAR</i>          | Also known as Promoter Of CDKN1A Antisense DNA Damage Activated RNA       | NA                              | [157] |
| 105 | <i>PCAT1</i>                    | Prostate Cancer Associated Transcript 1                                   | NA                              | [158] |
| 106 | <i>PGM5-AS1</i>                 | Phosphoglucomutase 5 Antisense RNA 1                                      | NA                              | [159] |
| 107 | <i>SEMA3B-AS1</i>               | Semaphorin 3B Antisense RNA 1                                             | NA                              | [160] |
| 108 | <i>SNHG20</i>                   | Small Nucleolar RNA Host Gene 20                                          | ATM-JAK-PD-L1 signaling pathway | [161] |
| 109 | <i>SNHG6</i>                    | Small Nucleolar RNA Host Gene 6                                           | NA                              | [162] |
| 110 | <i>SNHG8</i>                    | Small Nucleolar RNA Host Gene 8                                           | NA                              | [163] |
| 111 | <i>SPINT1-AS1</i>               | Serine Peptidase Inhibitor, Kunitz Type 1 Antisense RNA 1                 | NA                              | [164] |
| 112 | <i>TP73-AS1</i>                 | Tumor Protein P73 Antisense RNA 1                                         | NA                              | [165] |
| 113 | <i>ZNF667-AS1</i>               | Zinc Finger Protein 667 Antisense RNA 1                                   | NA                              | [166] |
| 114 | <i>AGPG or ACTG1P25</i>         | Actin Gamma 1 Pseudogene 25                                               | NA                              | [167] |
| 115 | <i>CASC8</i>                    | Cancer Susceptibility 8                                                   | NA                              | [168] |
| 116 | <i>EGFR-AS1</i>                 | Epidermal Growth Factor Receptor Antisense RNA 1                          | NA                              | [169] |
| 117 | <i>FAM225A</i>                  | Family With Sequence Similarity 225 Member A                              | NA                              | [170] |
| 118 | <i>FAM83H-AS1 or IQANK1</i>     | IQ Motif And Ankyrin Repeat Containing 1                                  | NA                              | [171] |
| 119 | <i>FGD5-AS1</i>                 | FYVE, RhoGEF And PH Domain Containing 5 Antisense RNA 1                   | NA                              | [172] |
| 120 | <i>FOXP4-AS1</i>                | Forkhead Box P4 Antisense RNA 1                                           | NA                              | [173] |
| 121 | <i>HCG22</i>                    | HLA Complex Group 22                                                      | NA                              | [174] |
| 122 | <i>HEIH</i>                     | Hepatocellular Carcinoma Up-Regulated EZH2-Associated Long Non-Coding RNA | NA                              | [175] |
| 123 | <i>IUR</i>                      | Imatinib-up-regulated lncRNA                                              | NA                              | [176] |
| 124 | <i>KLF3-AS1</i>                 | KLF3 Antisense RNA 1                                                      | NA                              | [177] |

|     |                                |                                                                          |                                         |       |
|-----|--------------------------------|--------------------------------------------------------------------------|-----------------------------------------|-------|
| 125 | <i>LINC00278</i>               | Long Intergenic Non-Protein Coding RNA 278                               | AR Signaling pathway                    | [178] |
| 126 | <i>LINC00337</i>               | Long Intergenic Non-Protein Coding RNA 337                               | NA                                      | [51]  |
| 127 | <i>LINC00662</i>               | Long Intergenic Non-Protein Coding RNA 662                               | NA                                      | [179] |
| 128 | <i>LINC00673</i>               | Long Intergenic Non-Protein Coding RNA 673                               | NA                                      | [180] |
| 129 | <i>LINC00963</i>               | Long Intergenic Non-Protein Coding RNA 963                               | NA                                      | [181] |
| 130 | <i>LINC01014</i>               | Long Intergenic Non-Protein Coding RNA 1014                              | EGFR-PI3K-AKT-mTOR signaling pathway    | [18]  |
| 131 | <i>LINC01232</i>               | Long Intergenic Non-Protein Coding RNA 1232                              | NA                                      | [182] |
| 132 | <i>LINC01433</i>               | Long Intergenic Non-Protein Coding RNA 1433                              | NA                                      | [183] |
| 133 | <i>LINC01535</i>               | Long Intergenic Non-Protein Coding RNA 1535                              | JAK/STAT3 signaling pathway             | [21]  |
| 134 | <i>LINC02042</i>               | Long Intergenic Non-Protein Coding RNA 2042                              | c-Myc signaling pathway                 | [184] |
| 135 | <i>LINP1</i>                   | LncRNA In Non-Homologous End Joining Pathway 1                           | NA                                      | [185] |
| 136 | <i>Lnc-ABCA12-3</i>            | ATP Binding Cassette Subfamily A Member 12-3                             | NA                                      | [186] |
| 137 | <i>Lnc-MCEI</i>                | Also known as Ribosomal Protein S10 Pseudogene 7 ( <i>RPS10P7</i> )      | NA                                      | [187] |
| 138 | <i>Lnc TUG1</i>                | Taurine Up-Regulated 1                                                   | Wnt/ $\beta$ -catenin signaling pathway | [188] |
| 139 | <i>LOC100133669</i>            | Also known as LY6E Divergent Transcript ( <i>LY6E-DT</i> )               | NA                                      | [189] |
| 140 | <i>LOC440173</i>               |                                                                          | NA                                      | [190] |
| 141 | <i>LOC441178</i>               |                                                                          | NA                                      | [191] |
| 142 | <i>MACC1-AS1 and FOXD2-AS1</i> | MACC1 Antisense RNA 1 and Forkhead Box D2 Adjacent Opposite Strand RNA 1 | NA                                      | [61]  |
| 143 | <i>MAFG-AS1 or MAFG-DT</i>     | MAF BZIP Transcription Factor G Divergent Transcript                     | NA                                      | [192] |
| 144 | <i>MIAT</i>                    | Myocardial Infarction Associated Transcript                              | NA                                      | [193] |
| 145 | <i>MIR205HG</i>                | MicroRNA 205 Host Gene                                                   | NA                                      | [194] |
| 146 | <i>NLIPMT</i>                  | Novel lncRNA inhibiting proliferation and metastasis                     | NA                                      | [195] |
| 147 | <i>PSMA3-AS1</i>               | Proteasome 20S Subunit Alpha 3 Antisense RNA 1                           | NA                                      | [196] |
| 148 | <i>PTCSC1</i>                  | Papillary Thyroid Carcinoma Susceptibility Candidate 1                   | Akt signaling pathway                   | [20]  |
| 149 | <i>SNHG22</i>                  | Small nucleolar RNA host gene 22                                         | NA                                      | [197] |
| 150 | <i>SNHG12</i>                  | Small nucleolar RNA host gene 12                                         | NA                                      | [198] |
| 151 | <i>TTY15</i>                   | Testis-Specific Transcript, Y-Linked 15                                  | JAK2 signaling pathway                  | [199] |
| 152 | <i>TUSC7</i>                   | Tumor Suppressor Candidate 7                                             | NA                                      | [200] |
| 153 | <i>uc061hsf.1</i>              |                                                                          | p53 signaling pathway                   | [201] |
| 154 | <i>UPK1A-AS1</i>               | Uroplakin 1A Antisense RNA 1                                             | NA                                      | [202] |

|     |                                |                                                                                            |                                           |       |
|-----|--------------------------------|--------------------------------------------------------------------------------------------|-------------------------------------------|-------|
| 155 | WDFY3-AS2                      | WD Repeat And FYVE Domain Containing 3 Antisense RNA 2                                     | NA                                        | [203] |
| 156 | ZEB2-AS1                       | Zinc Finger E-Box Binding Homeobox 2 Antisense RNA 1                                       | NA                                        | [204] |
| 157 | ZFPM2-AS1                      | Zinc Finger Protein, FOG Family Member 2 Antisense RNA 1                                   | NA                                        | [205] |
| 158 | BAALC-AS1                      | Brain And Acute Leukemia Cytoplasmic Antisense RNA 1                                       | NA                                        | [206] |
| 159 | BCAR4                          | Breast Cancer Anti-Estrogen Resistance 4                                                   | p53/p21 signaling pathway                 | [207] |
| 160 | CASC15                         | Cancer Susceptibility 15                                                                   | NA                                        | [208] |
| 161 | DGCR5                          | DiGeorge Syndrome Critical Region Gene 5                                                   | NA                                        | [209] |
| 162 | DIO3OS                         | Iodothyronine Deiodinase 3 Opposite Strand Upstream RNA                                    | NA                                        | [210] |
| 163 | FAM83A-AS1                     | Family With Sequence Similarity 83 Member A Antisense RNA 1                                | NA                                        | [211] |
| 164 | GAPLINC                        | Gastric Adenocarcinoma Associated, Positive CD44 Regulator, Long Intergenic Non-Coding RNA | NA                                        | [212] |
| 165 | GASL1 or GASAL1                | Growth Arrest Associated LncRNA 1                                                          | Wnt3a/ $\beta$ -catenin signaling pathway | [16]  |
| 166 | HCP5                           | HLA Complex P5                                                                             | PI3K/AKT/mTOR signaling pathway           | [19]  |
| 167 | KCNQ1 overlapping transcript 1 | Potassium Voltage-Gated Channel Subfamily Q Member 1 overlapping transcript 1              | NA                                        | [213] |
| 168 | LINC00239                      | Long Intergenic Non-Protein Coding RNA 239                                                 | NA                                        | [214] |
| 169 | LINC00261                      | Long Intergenic Non-Protein Coding RNA 261                                                 | NA                                        | [215] |
| 170 | LINC00467                      | Long Intergenic Non-Protein Coding RNA 467                                                 | NA                                        | [216] |
| 171 | LINC00491                      | Long Intergenic Non-Protein Coding RNA 491                                                 | NA                                        | [217] |
| 172 | LINC00551                      | Long Intergenic Non-Protein Coding RNA 551                                                 | NA                                        | [218] |
| 173 | LINC00941                      | Long Intergenic Non-Protein Coding RNA 941                                                 | NA                                        | [219] |
| 174 | LINC00958                      | Long Intergenic Non-Protein Coding RNA 958                                                 | NA                                        | [220] |
| 175 | LINC01305                      | Long Intergenic Non-Protein Coding RNA 1305                                                | NA                                        | [221] |
| 176 | LINCIN                         |                                                                                            | NA                                        | [222] |
| 177 | LINC-PINT                      | Long Intergenic Non-Protein Coding RNA, P53 Induced Transcript                             | NA                                        | [223] |
| 178 | LOC101928477                   | Uncharacterized LOC101928477                                                               | NA                                        | [224] |
| 179 | LOC146880 or ARHGAP27P1        | Rho GTPase Activating Protein 27 Pseudogene 1                                              | MAPK signaling pathway                    | [23]  |
| 180 | NEAT1                          | Long Noncoding RNA Nuclear Paraspeckle Assembly Transcript 1                               | MDM2 signaling pathway                    | [225] |
| 181 | SNHG7                          | Long non-coding RNA small nucleolar RNA host gene 7                                        | NA                                        | [226] |

|     |                         |                                                                                   |                        |       |
|-----|-------------------------|-----------------------------------------------------------------------------------|------------------------|-------|
| 182 | <i>LOXL1-AS1</i>        | Lysyl Oxidase Like 1 Antisense RNA 1                                              | NA                     | [227] |
| 183 | <i>MTX2-6</i>           | Metaxin 2-6                                                                       | NA                     | [228] |
| 184 | <i>MY or VPS9D1-AS1</i> | VPS9 Domain Containing 1 Antisense RNA 1                                          | NA                     | [229] |
| 185 | <i>SNHG5</i>            | Small Nucleolar RNA Host Gene 5                                                   | NA                     | [230] |
| 186 | <i>SOX4</i>             | SRY-Box Transcription Factor 4                                                    | NA                     | [231] |
| 187 | <i>THAP9-AS1</i>        | THAP Domain Containing 9 Antisense RNA 1                                          | NA                     | [232] |
| 188 | <i>TMEM161B-AS1</i>     | Transmembrane Protein 161B Divergent Transcript                                   | NA                     | [233] |
| 189 | <i>VESTAR</i>           | Vascular Endothelial Growth Factor C mRNA stability-associated long noncoding RNA | NA                     | [234] |
| 190 | <i>LINC00324</i>        | Long Intergenic Non-Protein Coding RNA 324                                        | MAPK signaling pathway | [24]  |
